# Supplementary material for: Transcriptomics insights into the genetic regulation of root apical meristem exhaustion and determinate primary root growth in Pachycereus pringlei (Cactaceae)
Source: PubMed Central journal article supplement (PMC5986787; doi:10.1038/s41598-018-26897-1), 2018-06-04
Supplement: 41598_2018_26897_MOESM1_ESM.pdf [file 41598_2018_26897_MOESM1_ESM.pdf]

**Transcriptomics insights into the genetic regulation of root apical meristem exhaustion and determinate primary root growth in *Pachycereus pringlei* (Cactaceae)**

Rodríguez-Alonso G.<sup>1</sup>, Matvienko M.<sup>2</sup>, López-Valle M. L.<sup>1</sup>, Lázaro-Mixteco P. E.<sup>1</sup>, Napsucialy-Mendivil S.<sup>1</sup>, Dubrovsky J. G.<sup>1</sup> and Shishkova S.<sup>1\*</sup>

<sup>1</sup> Departamento de Biología Molecular de Plantas, Instituto de Biotecnología, Universidad Nacional Autónoma de México, Cuernavaca, Mexico.

<sup>2</sup> Tecan Systems, 2450 Zanker Rd, San Jose, CA 95131, United States

\* Corresponding author: sveta @ ibt.unam.mx

**Supplementary Figure S1.** B2GO annotation statistics for the *de novo* assembled transcriptome of the *Pachycereus pringlei* primary root apex. Note: the following stats are from a representative subset of the total contigs. Upper panel: top hit species during the B2GO annotation; lower panel: distribution of similarity values between *P. pringlei* translated contigs and the top hit sequences during B2GO annotation.

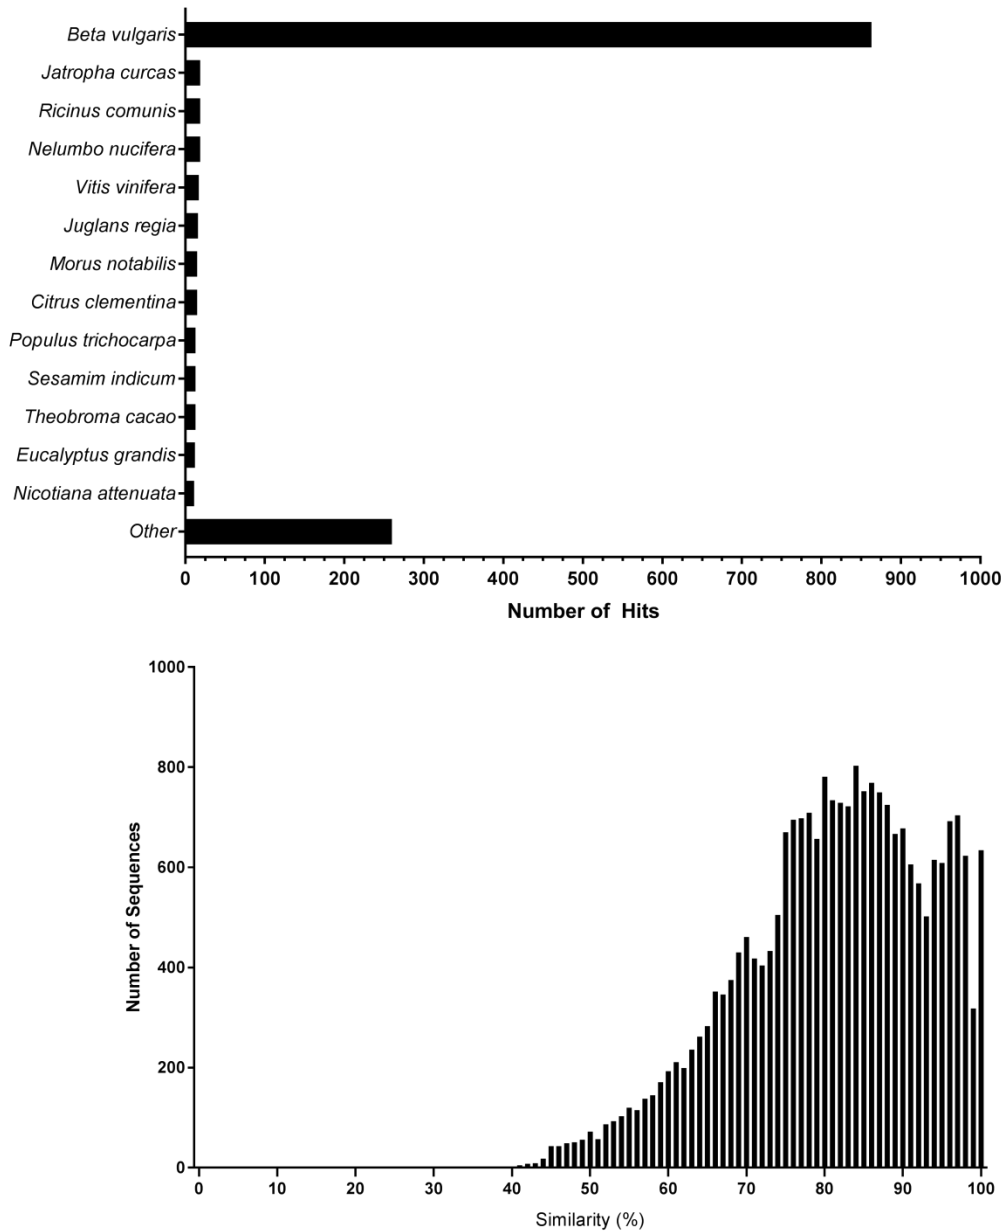

**Supplementary Figure S2.** The *Pachycereus pringlei* transcriptome is comprehensive. KEGG Automatic Annotation Server mapping of the *de novo* assembled primary root apex transcriptome of *P. pringlei* to some biological processes and pathways. The boxes in each process or pathway represent enzymes or structural proteins. Green boxes: at least one *P. pringlei* putative ortholog was identified in the transcriptome; white boxes: no *P. pringlei* putative ortholog was identified. Permission to use the schemes was kindly granted by Kanehisa Laboratories. Schemes were generated by the KAAS mapping tool (Moriya *et al.*, 2007, DOI:10.1093/nar/gkm321). Reference: Kanehisa M., Furumichi M., Tanabe M., Sato Y., Morishima K. KEGG: new perspectives on genomes, pathways, diseases and drugs. *Nuc. Ac. Res.* 45, D353-D361 (2017).

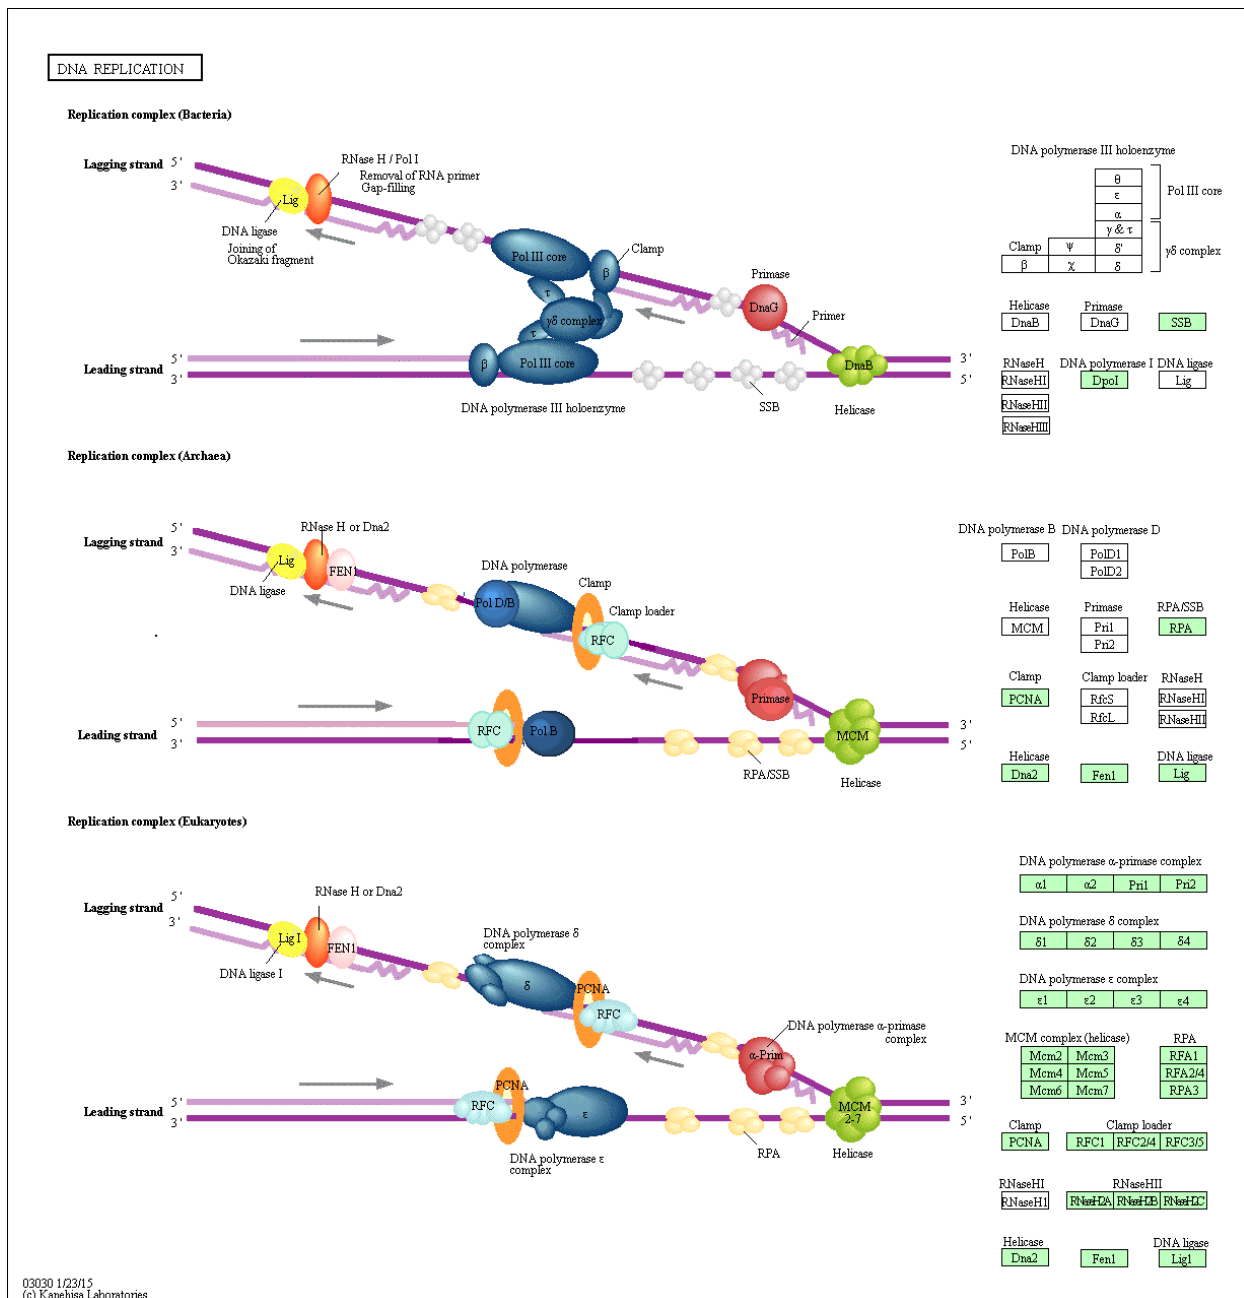

**BASAL TRANSCRIPTION FACTORS (EUKARYOTES)**

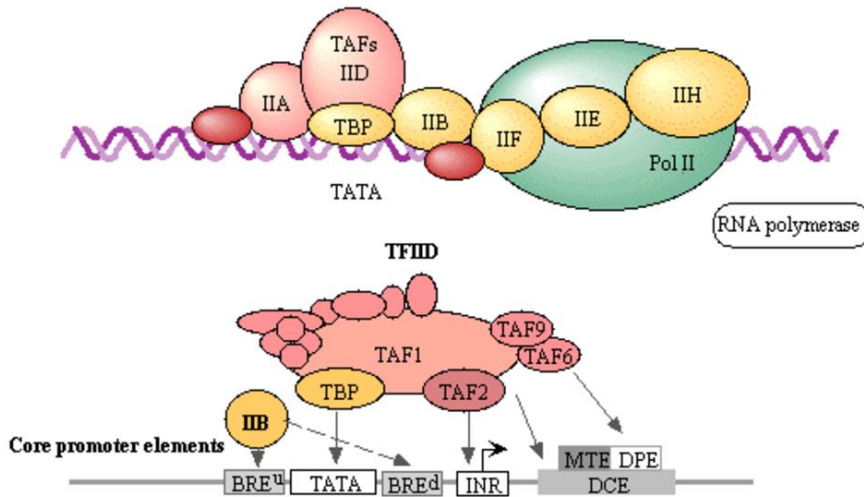

**General transcription factors for RNA polymerase II**

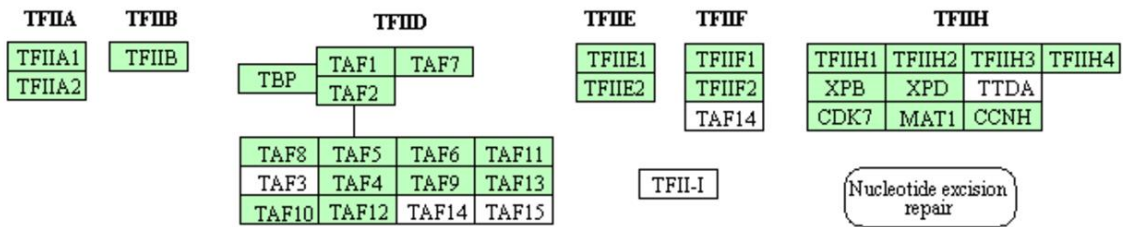

RNA POLYMERASE

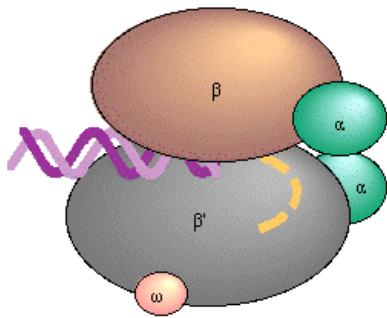

RNA polymerase (*Thermus aquaticus*)

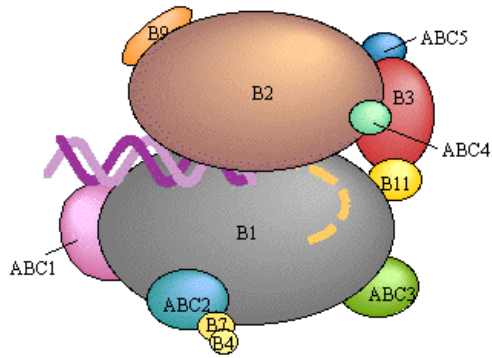

RNA polymerase II (*Saccharomyces cerevisiae*)

Bacterial

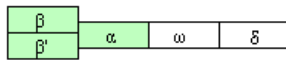

Archaeal

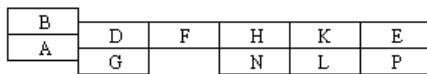

Eukaryotic Pol II

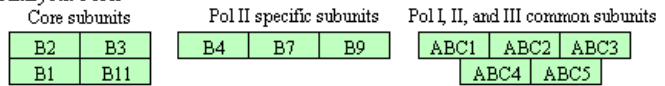

Eukaryotic Pol III

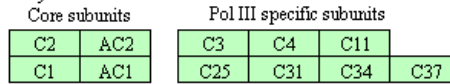

Eukaryotic Pol I

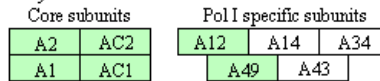

mRNA SURVEILLANCE PATHWAY

- Cap binding complex (CBC)**  
 CBP30  
 CBP20
- Exon-junction complex (EJC)**  
 Upf3  
 Y14 MLN51 SAP18 RNFS1  
 MAGOH EIF4A3 Pmin RefAly
- Transiently interacting factors**  
 Tap  
 UAF56 SRm160  
 p15  
 PYM

**Nucleus**

**Cytoplasm**

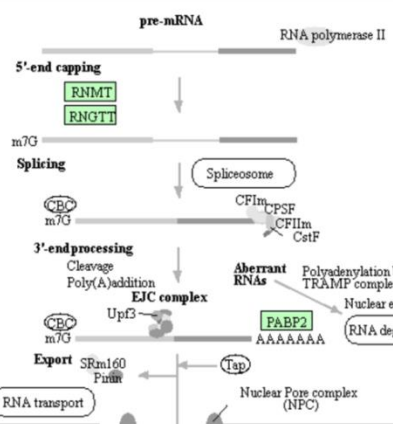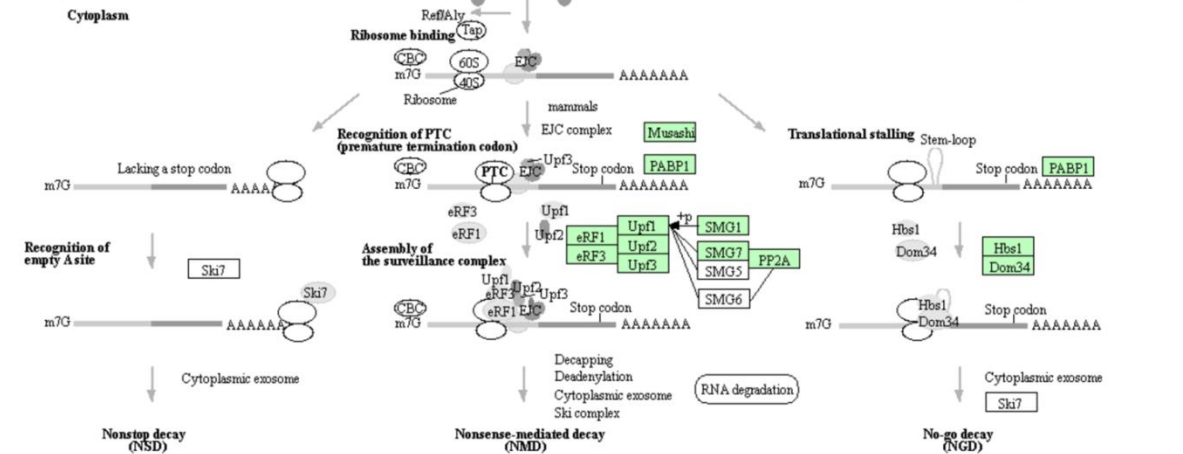

**Eukaryotic RNA degradation**

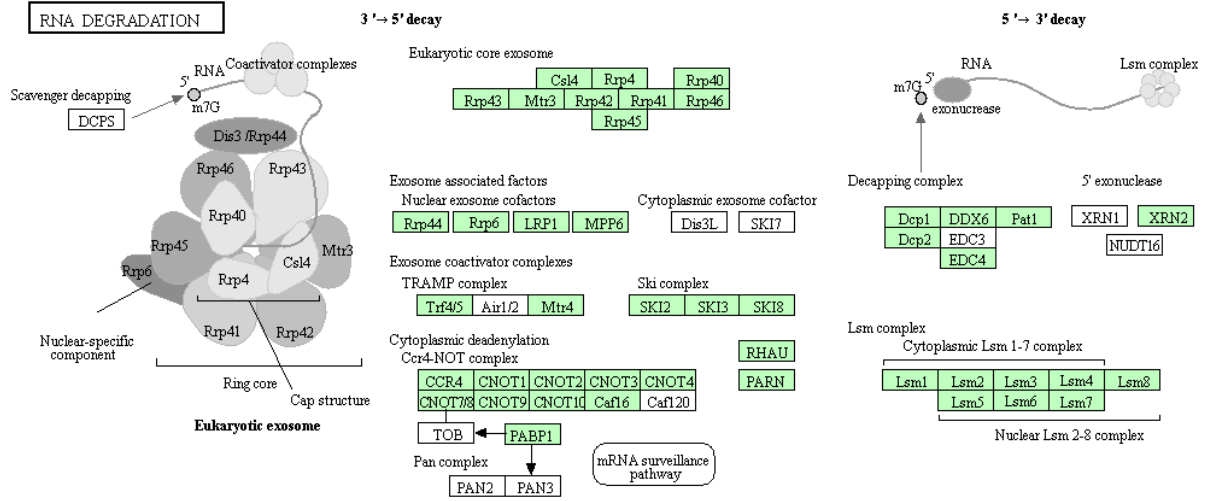

**Bacterial RNA degradation**

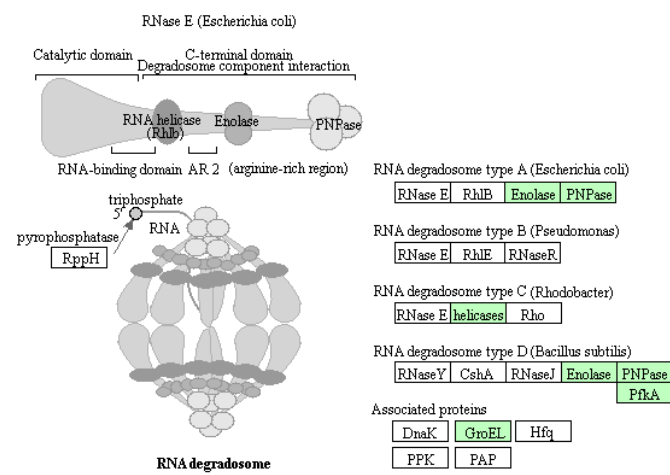

**Archeal RNA degradation**

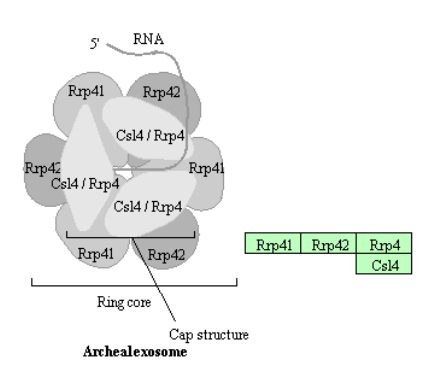

**RIBOSOME**

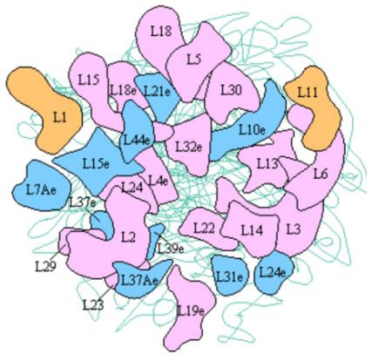

Large subunit (*Haloarcula marismortui*)

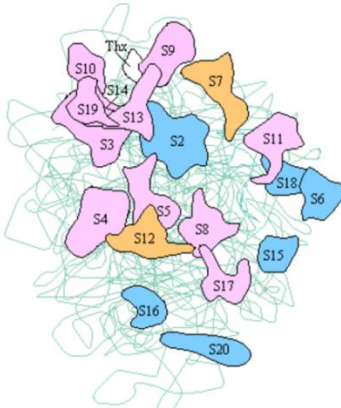

Small subunit (*Thermus aquaticus*)

**Ribosomal RNAs**

|                    |           |     |
|--------------------|-----------|-----|
| Bacteria / Archaea | 23S       | 16S |
| Eukaryotes         | 25S, 5.8S | 18S |

**Ribosomal proteins**

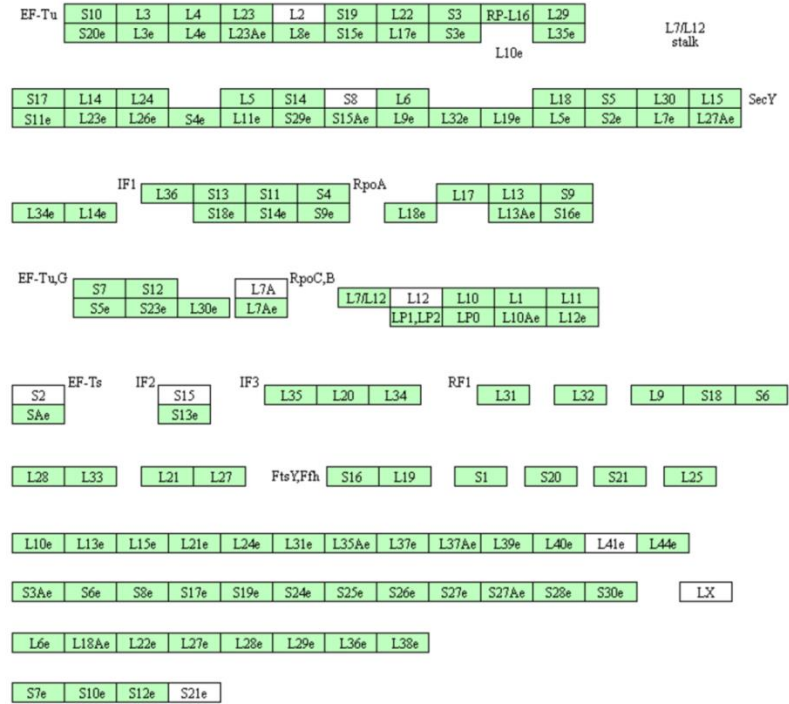



# RIBOSOME BIOGENESIS IN EUKARYOTES

## Ribosomal RNAs

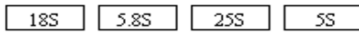

## 90S pre-ribosome components

### UTP-C complex

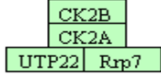

### t-UTP complex

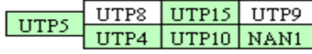

### UTP-B complex

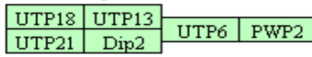

### MPP10 complex

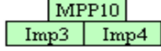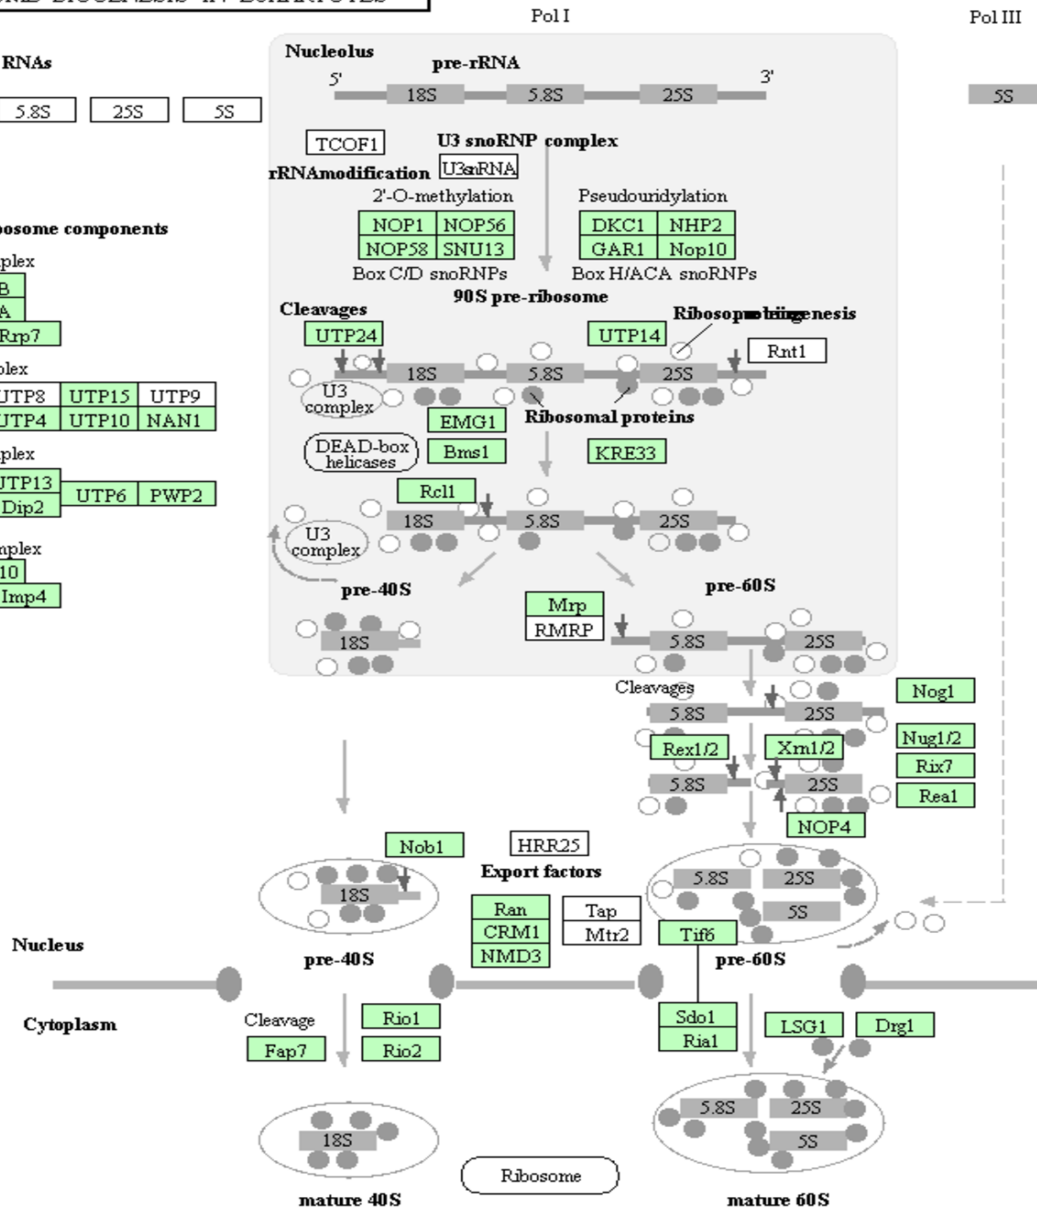

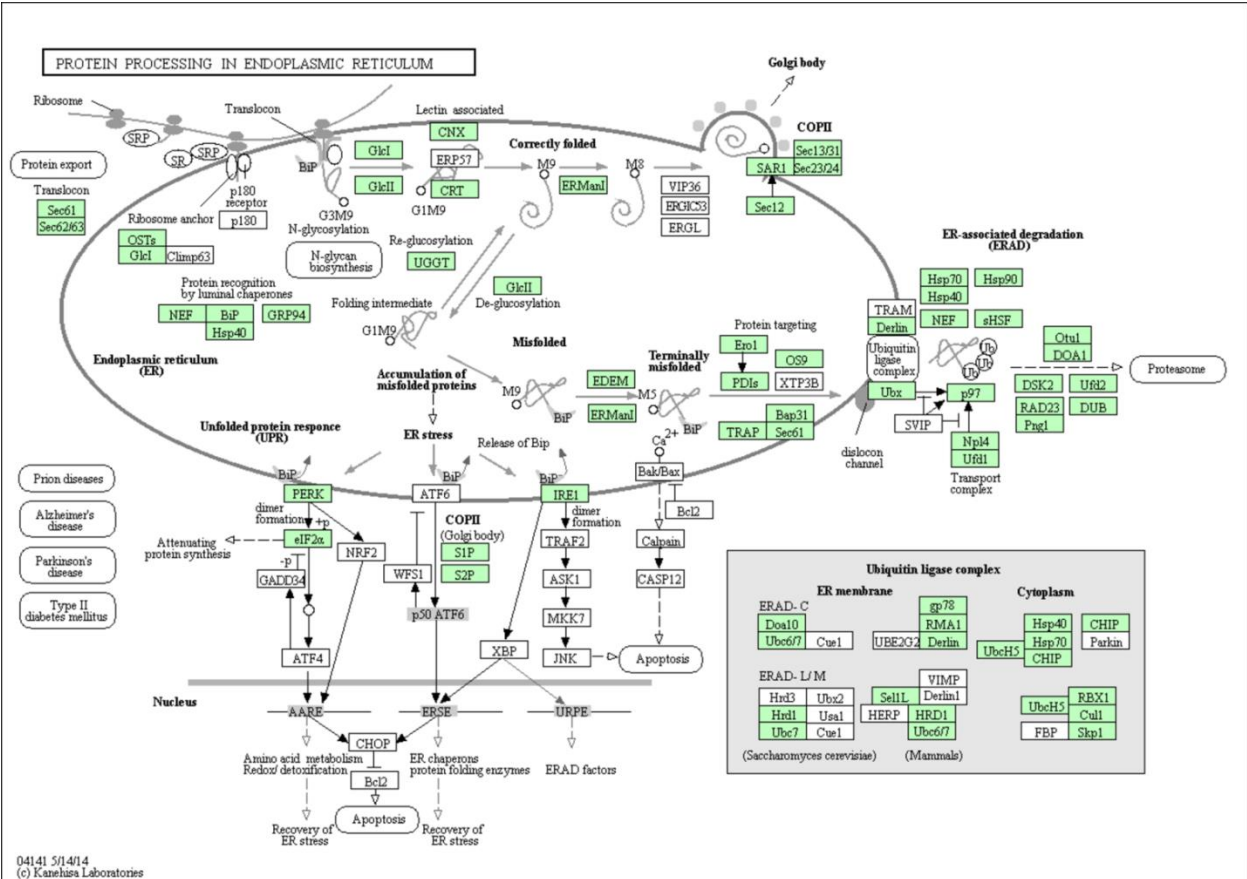

PLANT HORMONE SIGNAL TRANSDUCTION

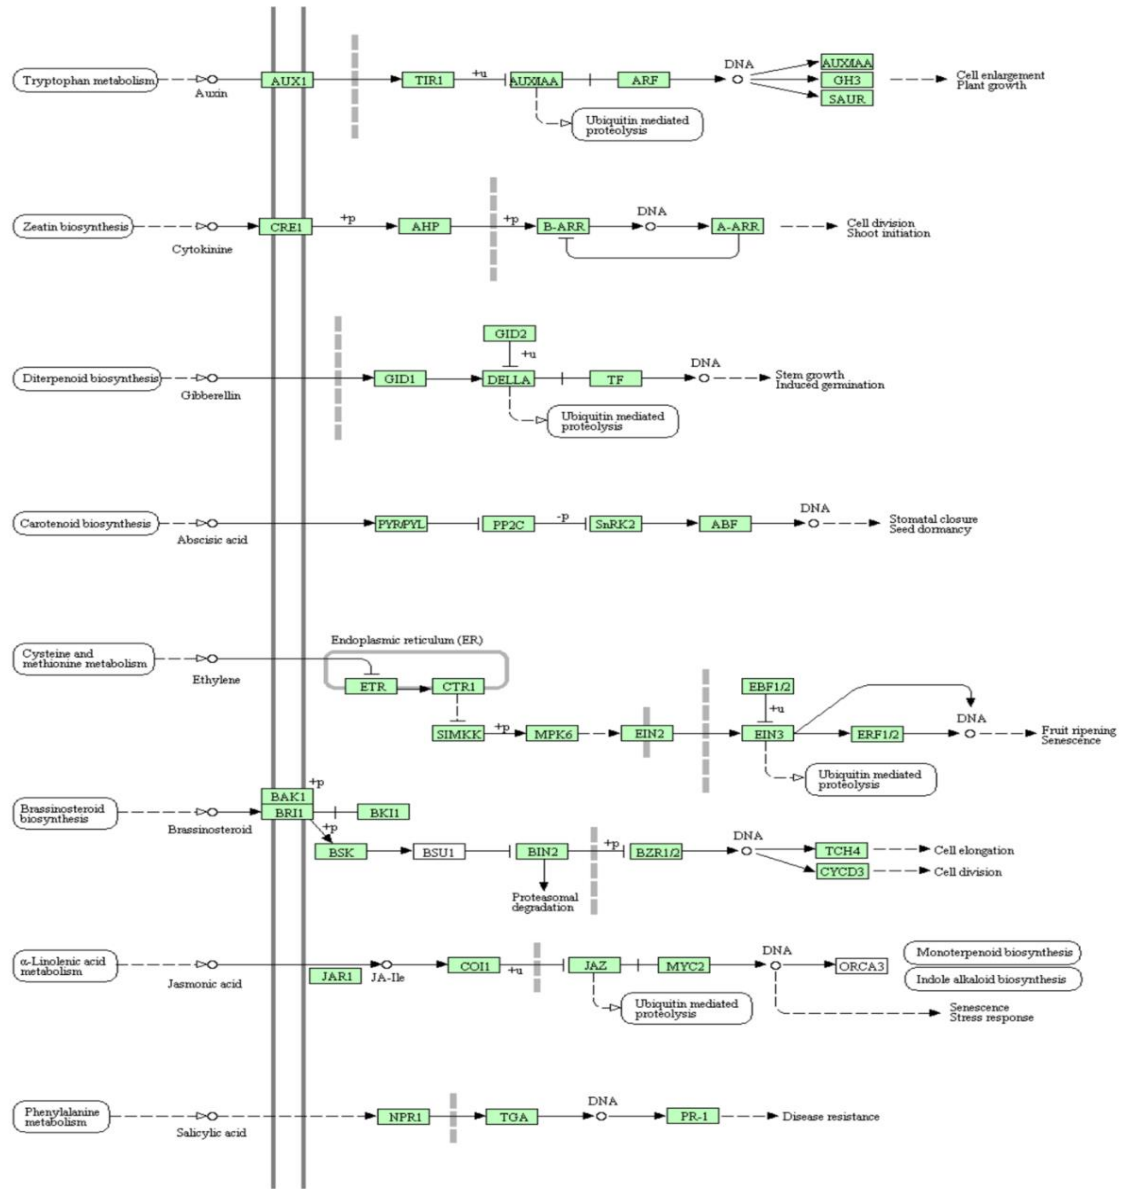

CARBON FIXATION IN PHOTOSYNTHETIC ORGANISMS

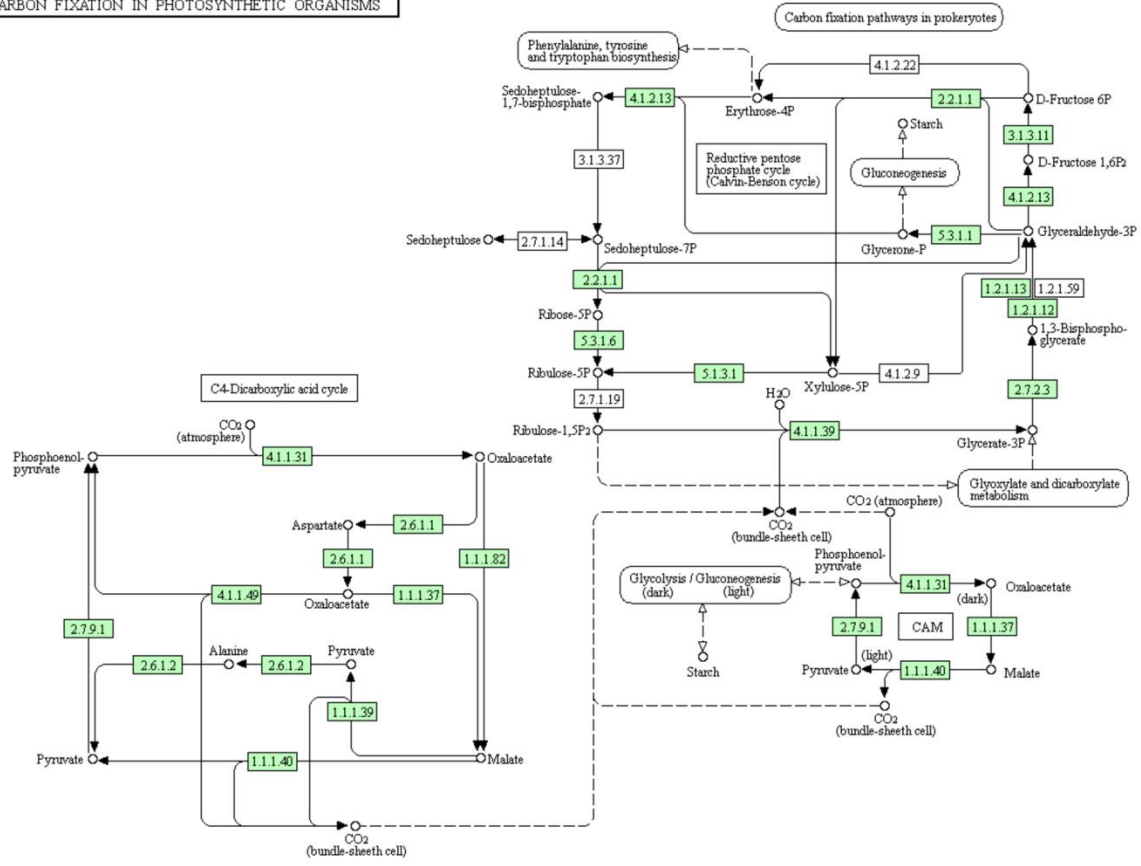

**Supplementary Figure S3.** Scree plot of the principal components for the *Pachycereus pringlei* samples used in this study. The cumulative variance of the two first principal components is 96.2%.

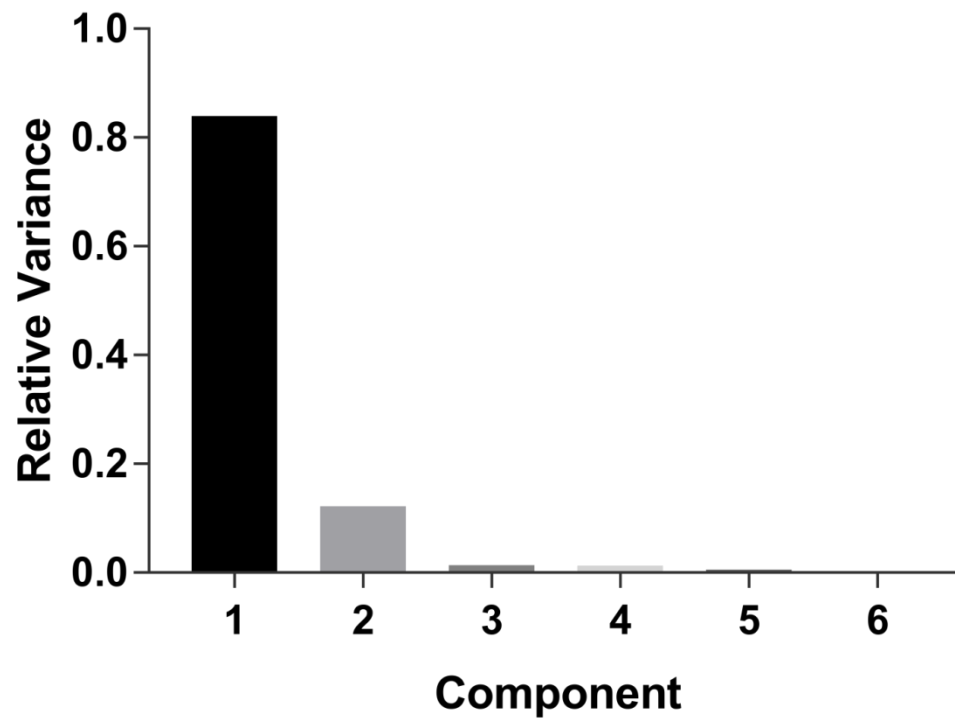

**Supplementary Figure S4.** Transcriptional profiles identified by *k*-mean clustering of the differentially expressed transcripts (DETs). Each plot depicts the normalized and centered expression level of the DETs at the three developmental stages of the *Pachycereus pringlei* primary root apex: IN, initial; IT, intermediate; TR, terminal.

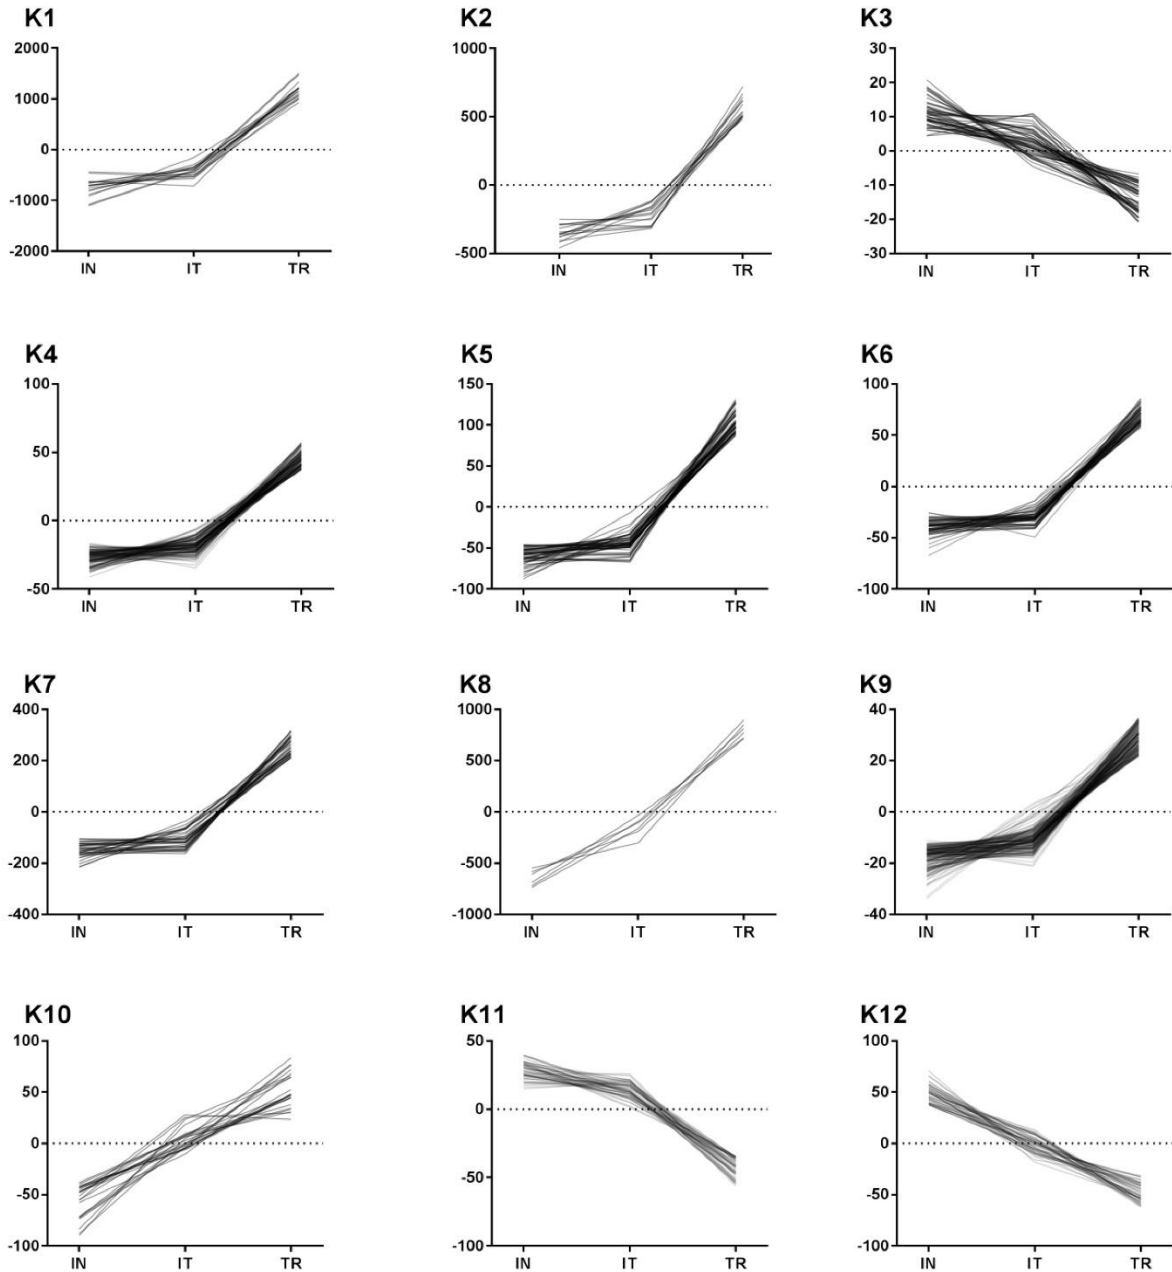

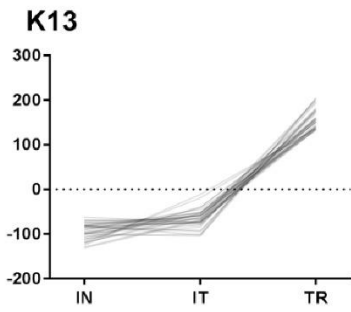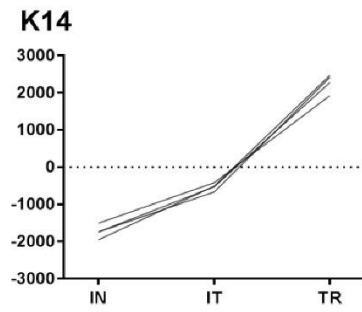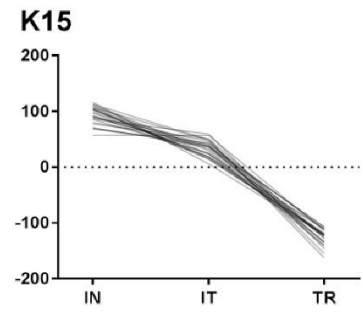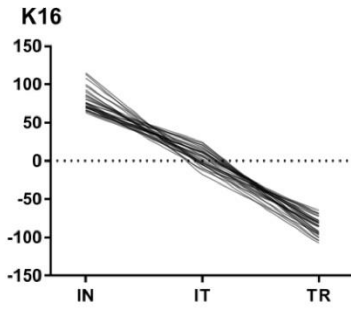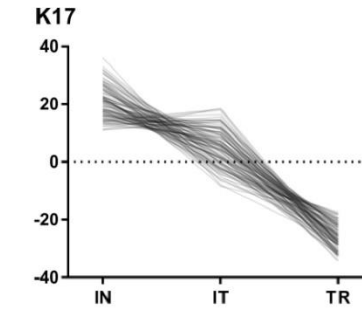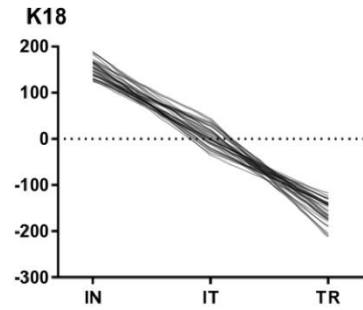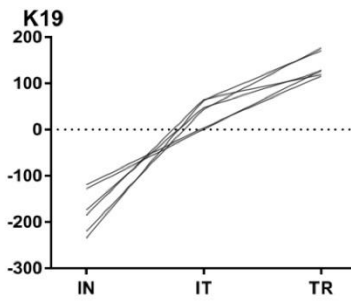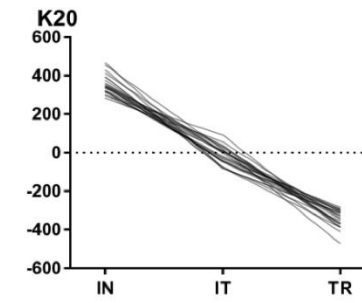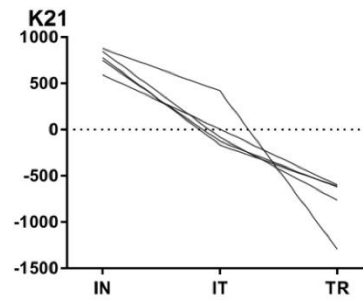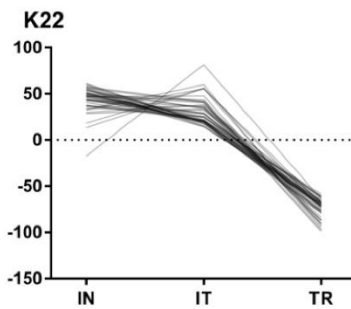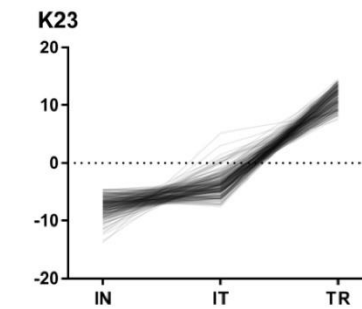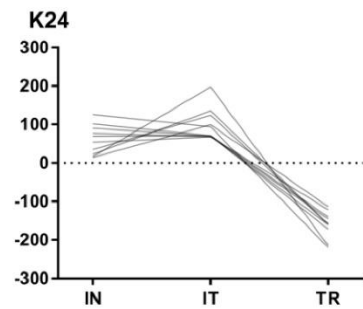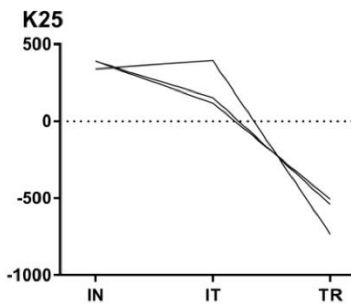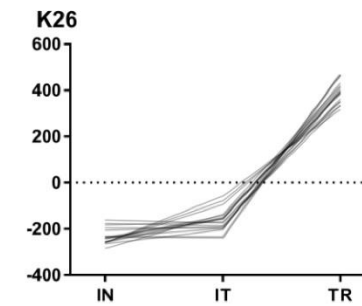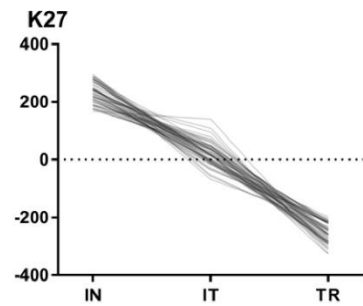

**Supplementary Figure S5.** Summary plot of the BlastN of the *Lophophora williamsii* shoot+root transcriptome against the *de novo* assembled transcriptome of the primary root apex of *Pachycereus pringlei*.

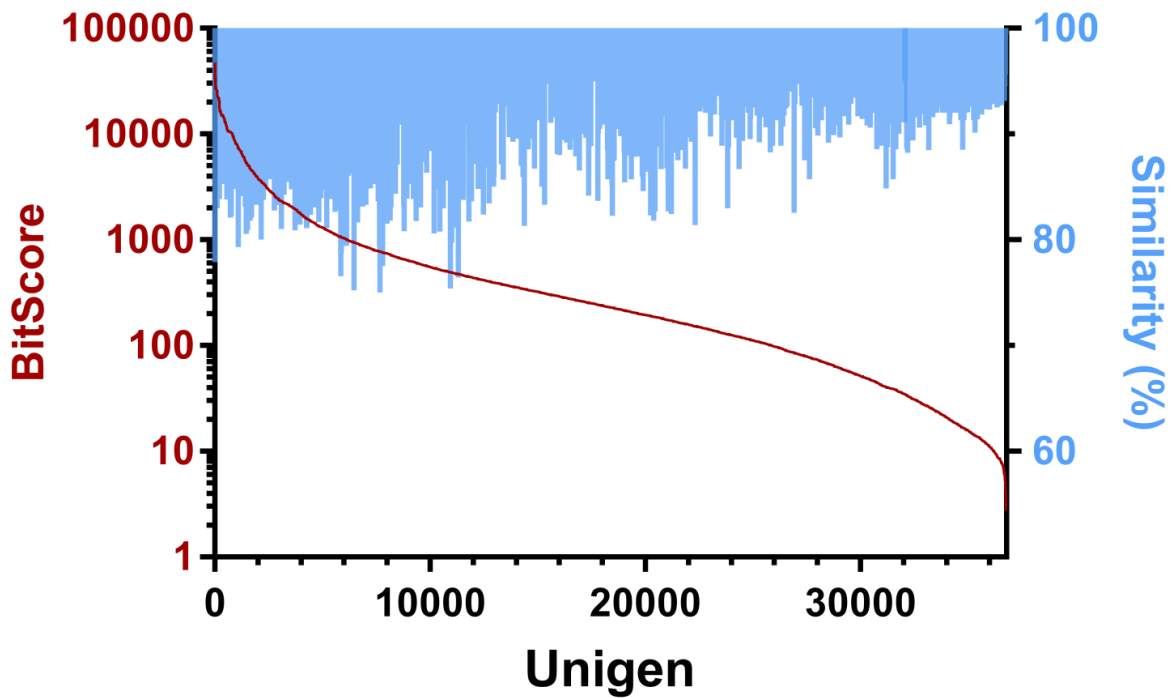

**Supplementary Figure S6.** Length distribution of the putative open reading frames identified in the un-annotated *Pachycereus pringlei* differentially expressed transcripts.

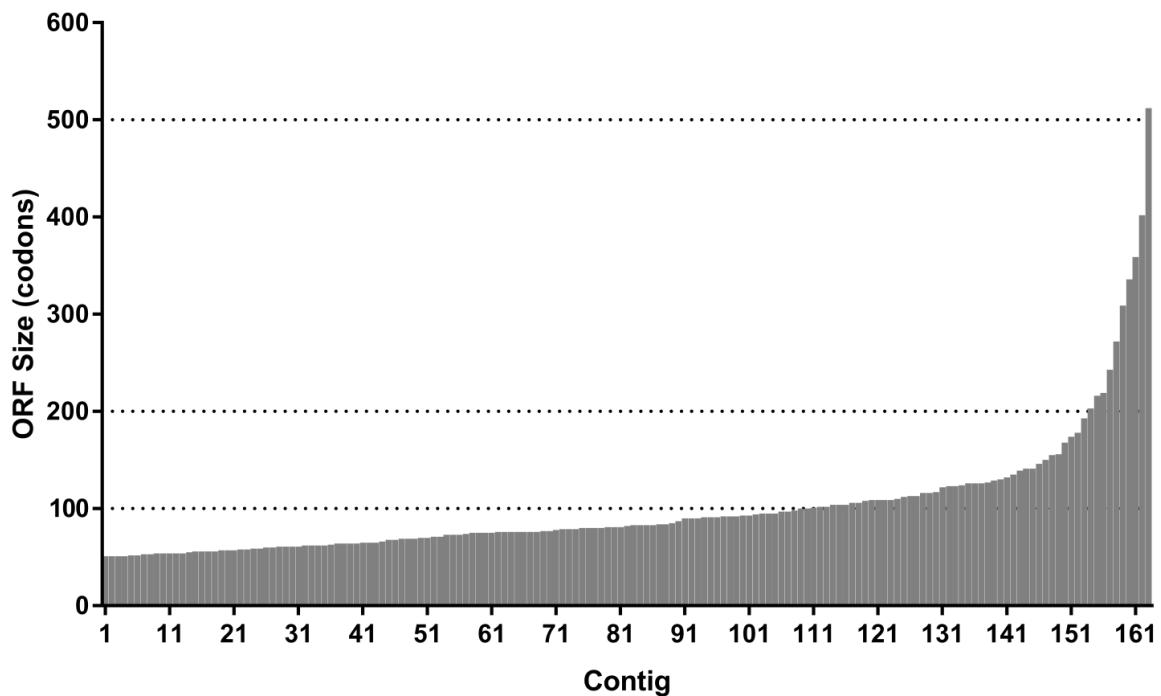



**Supplementary Figure S7.** Expression levels (RPKM values) of the *Pachycreus pringlei* candidate reference genes in the primary root apex at the initial and terminal developmental stages. Red diamonds correspond to the selected reference genes for this study.

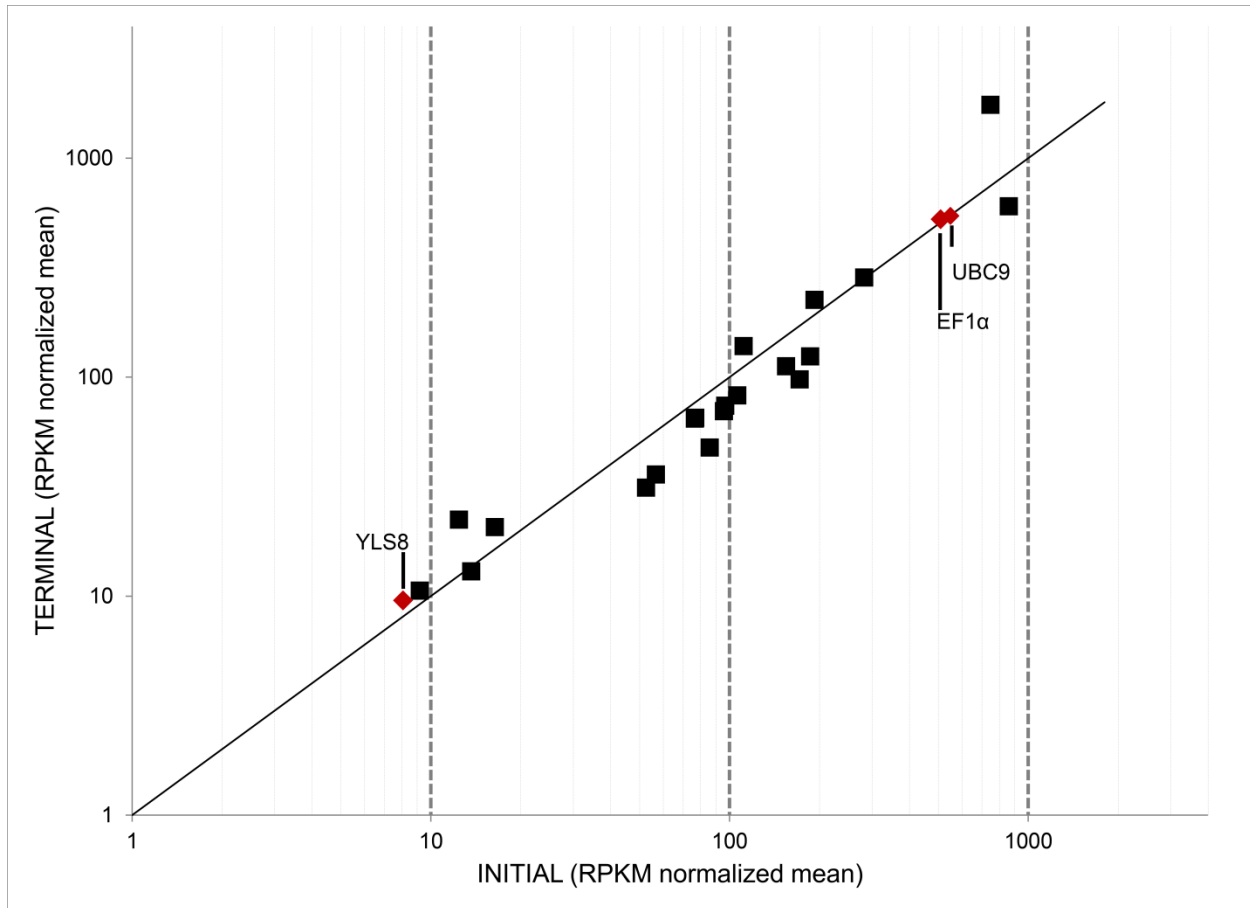

**Supplementary Figure S8.** Average RPKM values of the *Pachycereus pringlei* transcripts quantified by RT-qPCR. \* the trend for RPKM values and transcript abundance evaluated by qRT-PCR between initial and terminal development stages was different for this transcript.

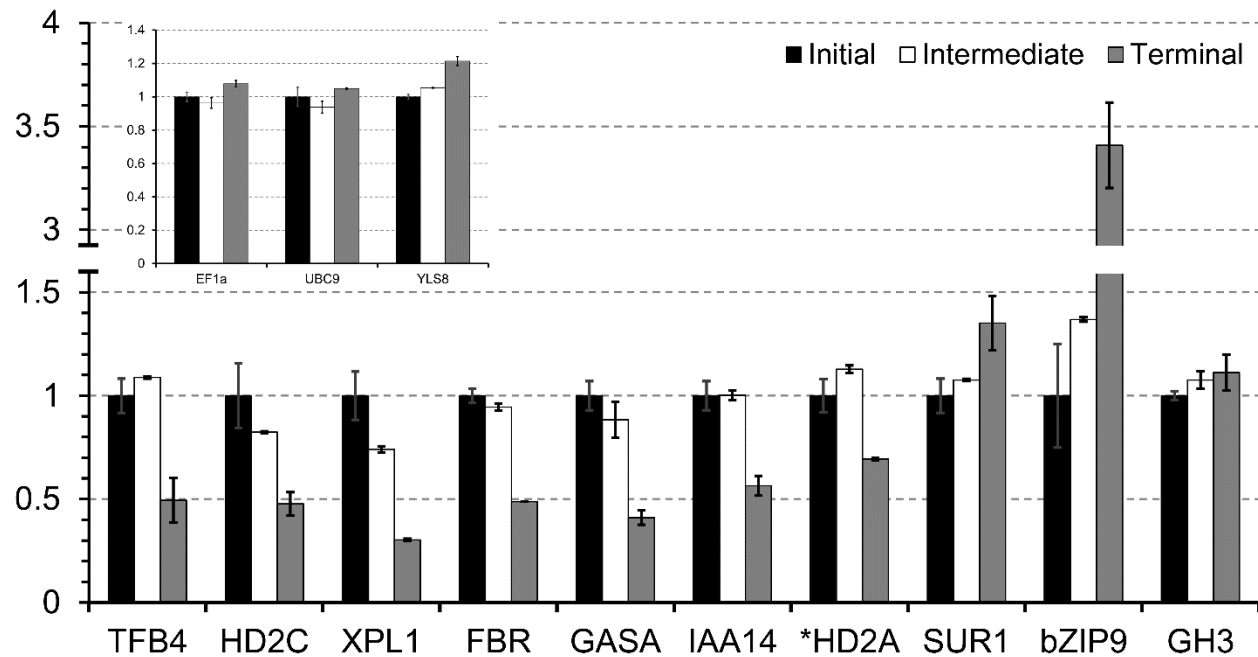

**Supplementary Figure S9.** Inferred transcriptional regulatory network for the *Pachycereus pringlei* primary root apex. The node size is proportional to the average expression level ( $\log_2(\text{RPKM})$ ) of the transcript in the *P. pringlei* transcriptome.

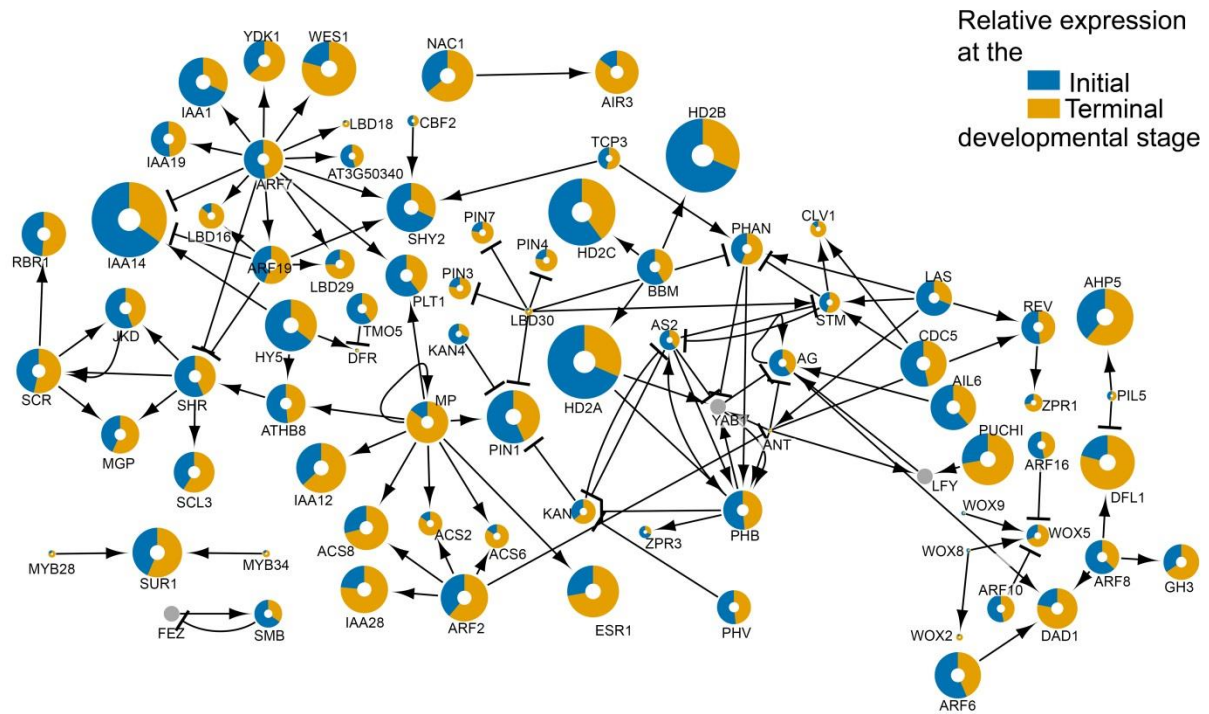

**Supplementary Table S1.** Number of differentially expressed genes for developmental zones of the primary root of six angiosperm species.

| Species                     | EDGE MZ vs EZ |       | EDGE MZ vs DZ |       |
|-----------------------------|---------------|-------|---------------|-------|
|                             | MZ            | EZ    | MZ            | DZ    |
| <i>Arabidopsis thaliana</i> | 2,683         | 4,432 | 3,734         | 8,947 |
| <i>Cucumis sativus</i>      | 601           | 380   | 1,341         | 301   |
| <i>Glycine max</i>          | 1,357         | 4,159 | 3,866         | 7,685 |
| <i>Oryza sativa</i>         | 772           | 1,655 | 3,084         | 7,743 |
| <i>Solanum lycopersicum</i> | 2,905         | 3,542 | 4,125         | 5,661 |
| <i>Zea mays</i>             | 2,018         | 3,285 | 8,012         | 8,563 |

\*With the exception of *Cucumis sativus*, the number of up-regulated genes at the meristematic zone is lower in comparison to the up-regulated genes at the elongation or differentiation zone. This exception may arise from the fact that in *C. sativus*, unlike all the other species included in this table, new lateral root primordia are developed within meristematic zone (moreover, *C. sativus* develops the first lateral root primordia since the embryo development) (Dubrovsky & Rost, 2003).

Row data taken from Huang & Schiefelbein, 2015.

Dubrovsky J.G. & Rost T.L. 2003. Lateral root initiation. Encyclopedia of Applied Plant Sciences. Ed. by Thomas B., Murphy D.J., and Murray B.G. Academic Press (ISBN:0122270509) pp: 1101-1107.

**Supplementary Table S2.** Comparison of *Lophophora williamsii* and *Pachycereus pringlei* *de novo* assembled transcriptomes.

|            |                           | <i>Lophophora</i> * | <i>Pachycereus</i>  |
|------------|---------------------------|---------------------|---------------------|
| Sequencing | Platform                  | IonTorrent / 454    | Illumina HiSeq      |
|            | Reads:                    | Single End          | Paired End          |
|            | Total Reads               | 6x10 <sup>6</sup>   | 280x10 <sup>6</sup> |
|            | Read Size (nt)            | 50-150              | 100 (x2)            |
| Assembly   | Min. contig Length (nt)   | 200                 | 400                 |
|            | Max. contig Length (nt)   | 4,170               | 14,583              |
|            | Av. contig Length (nt)    | 572                 | 1,081               |
|            | Median contig Length (nt) | 454                 | 728                 |
|            | Total contigs             | 40,436              | 49,045              |

\* Data taken from Ibarra-Laclette *et al.*, 2015.

**Supplementary Table S3.** BlastN statistics from the comparison of *Lophophora williamsii* shoot+root transcriptome and *Pachycereus pringlei* root tip transcriptome.

|           | Minimum | Maximum   | Average  | Median |
|-----------|---------|-----------|----------|--------|
| Identity  | 75      | 100       | 99.26    | 100    |
| Bit Score | 20.02   | 47,628.06 | 1,054.18 | 261.38 |
| HSP*      | 1       | 270       | 21.6     | 21     |
| E-value   | 0       | 9.75      | 0.02     | 0      |

\* HSP: High-scoring significant pair.

**Supplementary Table S4.** *Pachycereus pringlei* putative orthologs of the *Arabidopsis*

superior reference genes (Czechowski *et al.*, 2005). The less variable contigs are

included in the box. The asterisks indicate the reference genes used in this study.

| Arabidopsis name               | <i>P. pringlei</i> Contig | INITIAL       |               | INTERMEDIATE  |               | TERMINAL      |               |
|--------------------------------|---------------------------|---------------|---------------|---------------|---------------|---------------|---------------|
|                                |                           | RPKM 1        | RPKM 2        | RPKM 1        | RPKM 2        | RPKM 1        | RPKM 2        |
| AcylCoA BP                     | 03269                     | 73.21         | 58.6          | 66.48         | 66.63         | 38.02         | 38.08         |
| PP2A                           | 05248                     | 142.42        | 121.42        | 123.2         | 123.98        | 77.23         | 78.74         |
| AcylCoA BP                     | 02079                     | 43.93         | 36.76         | 39.08         | 40.8          | 24.55         | 25.43         |
| CLA                            | 09503                     | 44.57         | 42.57         | 45.06         | 40.6          | 26.73         | 30.67         |
| PP2A                           | 09902                     | 149.25        | 136.93        | 142.45        | 131.55        | 99.33         | 99.38         |
| E2F $\alpha$                   | 05001                     | 717.61        | 604.83        | 684.04        | 727.78        | 545           | 415.74        |
| PP2A                           | 08913                     | 112.74        | 124.83        | 112.59        | 100.72        | 88.43         | 90.68         |
| CLA                            | 12003                     | 76.83         | 70.33         | 70.34         | 74.13         | 51.9          | 55.87         |
| PP2A                           | 07793                     | 73.44         | 75.34         | 66.15         | 55.63         | 53.3          | 65.22         |
| PP2A                           | 04543                     | 84.65         | 78.54         | 76.9          | 77.21         | 61.8          | 70.07         |
| UBC                            | 22624                     | 59.02         | 58.65         | 56.54         | 54.67         | 48.15         | 55.25         |
| KOR1                           | 03527                     | 58.84         | 59.27         | 64.18         | 72.66         | 54.75         | 49.39         |
| KOR1                           | 22902                     | 10.52         | 10.46         | 14.94         | 17.09         | 10.13         | 10.62         |
| <b>UBC</b>                     | <b>24691</b>              | <b>414.88</b> | <b>427.47</b> | <b>396.49</b> | <b>377.1</b>  | <b>402.53</b> | <b>470.79</b> |
| <b>UBC9*</b>                   | <b>15035</b>              | <b>229.12</b> | <b>204.45</b> | <b>210.96</b> | <b>195.78</b> | <b>226.4</b>  | <b>228.57</b> |
| <b>E1F<math>\alpha</math>*</b> | <b>06759</b>              | <b>401.27</b> | <b>379.59</b> | <b>363.6</b>  | <b>388.22</b> | <b>428.72</b> | <b>413.51</b> |
| <b>GalaOx</b>                  | <b>03600</b>              | <b>7.44</b>   | <b>6.67</b>   | <b>8.34</b>   | <b>8.38</b>   | <b>9.1</b>    | <b>7.8</b>    |
| <b>YLS8*</b>                   | <b>17282</b>              | <b>145.98</b> | <b>150.19</b> | <b>156.32</b> | <b>155.68</b> | <b>183.81</b> | <b>175.92</b> |
| <b>AGL31</b>                   | <b>07058</b>              | <b>5.9</b>    | <b>6.49</b>   | <b>5.29</b>   | <b>7.16</b>   | <b>7.85</b>   | <b>7.45</b>   |
| UBC                            | 17222                     | 80.47         | 90.87         | 89.78         | 90.51         | 100.3         | 121.37        |
| PTB                            | 48438                     | 12.67         | 12.51         | 16.71         | 20.22         | 16.55         | 16.46         |
| YLS8                           | 30952                     | 9.48          | 9.62          | 7.07          | 7.67          | 19.24         | 16.42         |
| UBC                            | 35678                     | 525.63        | 622.83        | 655.12        | 672.13        | 1,546.79      | 1,249.75      |

**Supplementary Table S5.** Interaction of the *Arabidopsis* nodes used for the *Pachycereus pringlei* transcriptional regulatory network.

| Node A    | Interaction type | Node B    |
|-----------|------------------|-----------|
| AT1G30330 | Activation       | AT2G44810 |
| AT1G30490 | Repression       | AT5G16560 |
| AT5G16560 | Repression       | AT1G65620 |
| AT5G16560 | Repression       | AT1G73590 |
| AT1G09770 | Activation       | AT1G62360 |
| AT1G09770 | Activation       | AT1G75820 |
| AT1G62360 | Repression       | AT2G37630 |
| AT1G62360 | Repression       | AT1G65620 |
| AT1G62360 | Activation       | AT1G75820 |
| AT2G45190 | Repression       | AT4G18960 |
| AT2G45190 | Activation       | AT2G34710 |
| AT4G18960 | Activation       | AT2G44810 |
| AT4G18960 | Activation       | AT4G18960 |
| AT2G34710 | Activation       | AT1G65620 |
| AT2G34710 | Repression       | AT5G16560 |
| AT2G34710 | Activation       | AT2G45190 |
| AT2G34710 | Activation       | AT3G52770 |
| AT2G37630 | Activation       | AT2G34710 |
| AT2G37630 | Repression       | AT2G45190 |
| AT1G65620 | Repression       | AT2G45190 |
| AT1G65620 | Activation       | AT2G34710 |
| AT1G65620 | Repression       | AT1G62360 |
| AT1G65620 | Repression       | AT5G16560 |
| AT4G37750 | Activation       | AT5G61850 |
| AT4G37750 | Activation       | AT5G60690 |
| AT4G37750 | Repression       | AT4G18960 |
| AT4G37750 | Activation       | AT2G45190 |
| AT4G37750 | Activation       | AT2G34710 |
| AT5G42630 | Repression       | AT1G73590 |
| AT5G45980 | Activation       | AT5G59340 |
| AT5G45980 | Activation       | AT3G11260 |
| AT5G62000 | Activation       | AT1G01480 |
| AT5G62000 | Activation       | AT4G11280 |
| AT5G62000 | Repression       | AT4G37750 |
| AT5G62000 | Activation       | AT4G37770 |
| AT5G62000 | Activation       | AT5G25890 |
| AT2G28350 | Repression       | AT3G11260 |
| AT5G61850 | Activation       | AT4G18960 |



|           |            |           |
|-----------|------------|-----------|
| AT5G60690 | Activation | AT2G45450 |
| AT3G44750 | Activation | AT2G34710 |
| AT3G44750 | Activation | AT2G45190 |
| AT1G55580 | Activation | AT1G62360 |
| AT1G55580 | Activation | AT2G37630 |
| AT1G55580 | Activation | AT5G60690 |
| AT1G55580 | Activation | AT4G37750 |
| AT1G79580 | Repression | AT1G26870 |
| AT1G26870 | Activation | AT1G79580 |
| AT1G56010 | Activation | AT2G04160 |
| AT3G25710 | Repression | AT5G42800 |
| AT4G30080 | Repression | AT3G11260 |
| AT4G25470 | Activation | AT1G04240 |
| AT4G37650 | Activation | AT5G03150 |
| AT4G37650 | Activation | AT3G54220 |
| AT4G37650 | Activation | AT1G03840 |
| AT4G37650 | Activation | AT1G50420 |
| AT5G03150 | Activation | AT3G54220 |
| AT3G54220 | Activation | AT1G03840 |
| AT3G54220 | Activation | AT3G12280 |
| AT3G54220 | Activation | AT5G03150 |
| AT5G11260 | Activation | AT4G32880 |
| AT5G11260 | Activation | AT4G14550 |
| AT5G11260 | Activation | AT5G42800 |
| AT4G32880 | Activation | AT4G37650 |
| AT5G10510 | Activation | AT4G18960 |
| AT1G19850 | Activation | AT3G20840 |
| AT1G19850 | Activation | AT4G11280 |
| AT1G19850 | Activation | AT4G32880 |
| AT1G19850 | Activation | AT4G37770 |
| AT1G19850 | Activation | AT1G04550 |
| AT1G19850 | Activation | AT1G12980 |
| AT1G19850 | Activation | AT1G19850 |
| AT1G19850 | Activation | AT1G73590 |
| AT1G19850 | Activation | AT1G01480 |
| AT5G61420 | Activation | AT2G20610 |
| AT2G33880 | Activation | AT3G11260 |
| AT1G53230 | Activation | AT2G37630 |
| AT1G53230 | Activation | AT1G04240 |
| AT1G19220 | Repression | AT4G14550 |
| AT1G19220 | Repression | AT4G37650 |
| AT1G19220 | Activation | AT2G42430 |
| AT1G19220 | Activation | AT3G58190 |

|           |            |           |
|-----------|------------|-----------|
| AT1G19220 | Activation | AT1G04240 |
| AT2G20180 | Activation | AT1G03430 |
| AT2G20180 | Repression | AT5G54510 |
| AT5G20730 | Activation | AT3G20840 |
| AT5G20730 | Activation | AT3G15540 |
| AT5G20730 | Activation | AT3G58190 |
| AT5G20730 | Activation | AT3G50340 |
| AT5G20730 | Activation | AT1G19220 |
| AT5G20730 | Activation | AT1G04240 |
| AT5G20730 | Activation | AT2G45420 |
| AT5G20730 | Activation | AT2G42430 |
| AT5G20730 | Repression | AT4G37650 |
| AT5G20730 | Activation | AT4G14560 |
| AT5G20730 | Repression | AT4G14550 |
| AT5G20730 | Activation | AT4G37390 |
| AT5G20730 | Activation | AT4G27260 |
| AT5G17430 | Activation | AT3G44750 |
| AT5G17430 | Activation | AT5G03740 |
| AT5G17430 | Activation | AT5G22650 |
| AT5G18560 | Activation | AT5G61850 |
| AT5G37020 | Activation | AT1G28130 |
| AT5G37020 | Activation | AT2G44810 |
| AT5G37020 | Activation | AT5G54510 |
| AT5G60890 | Activation | AT2G20610 |
| AT4G00220 | Repression | AT2G37630 |
| AT4G00220 | Repression | AT2G01420 |
| AT4G00220 | Repression | AT1G73590 |
| AT4G00220 | Repression | AT1G70940 |
| AT4G00220 | Activation | AT1G62360 |
| AT4G00220 | Repression | AT1G23080 |

**Supplementary Table S6.** Properties of the nodes included in the *Pachycereus*

*pringlei* transcriptional regulatory network of the primary root apex. NSH=No significant

hit; NHF=No hit found; Y= Yes; N=No; Interm.=Intermediate.

| Node      | <i>Arabidopsis</i><br>name | <i>P. pringlei</i><br>contig | <i>P. pringlei</i> annotation                                     | E-value   | BBH | RPKM<br>Initial | RPKM<br>Interm. | RPKM<br>Term. |
|-----------|----------------------------|------------------------------|-------------------------------------------------------------------|-----------|-----|-----------------|-----------------|---------------|
| AT1G30330 | ARF6                       | 0001038                      | auxin response factor<br>6-like                                   | 0         | Y   | 24.12           | 27.34           | 18.65         |
| AT2G44810 | DAD1                       | 0005103                      | phospholipase a1-<br>chloroplastic-like                           | 2.52E-75  | N   | 7.27            | 9.93            | 25.76         |
| AT1G30490 | PHV                        | 0001618                      | homeobox-leucine<br>zipper protein revoluta                       | 0         | Y   | 7.93            | 9.77            | 7.39          |
| AT5G16560 | KAN                        | 0005141                      | probable transcription<br>factor kan2-like                        | 4.24E-47  | N   | 2.62            | 4.36            | 4.6           |
| AT1G09770 | CDC5                       | 0000721                      | cell division cycle 5-like<br>isoform x1                          | 0         | Y   | 23.08           | 26.9            | 20.04         |
| AT1G62360 | STM                        | 0009327                      | homeobox protein<br>knotted-1-like 6                              | 3.66E-72  | N   | 2.52            | 2.83            | 3.05          |
| AT1G75820 | CLV1                       | 0001781                      | receptor protein kinase<br>clavata1-like                          | 0         | Y   | 0.6             | 1.5             | 3.68          |
| AT2G45190 | YAB1                       | NSH                          | NSH                                                               | 3.51      | NSH | 0.001           | 0.001           | 0.001         |
| AT4G18960 | AG                         | 0032278                      | mads-box transcription<br>factor 27-like isoform x1               | 2.62E-44  | N   | 6.33            | 3.48            | 4.25          |
| AT2G34710 | PHB                        | 0000849                      | homeobox-leucine<br>zipper family protein                         | 0         | Y   | 12.14           | 14.87           | 11.42         |
| AT2G37630 | PHAN                       | 0008775                      | transcription factor as1<br>lob domain-containing                 | 1.94E-118 | Y   | 5.7             | 8.01            | 7.17          |
| AT1G65620 | AS2                        | 0027369                      | protein 6                                                         | 1.71E-62  | Y   | 2.89            | 3.22            | 1.86          |
| AT1G73590 | PIN1                       | 0002874                      | auxin efflux carrier<br>component 1-like                          | 0         | Y   | 44.07           | 46              | 33.59         |
| AT3G52770 | ZPR3                       | 0030394                      | PREDICTED:<br>uncharacterized protein<br>LOC101514572             | 1.15E-08  | Y   | 1.74            | 1.66            | 0.78          |
| AT4G37750 | ANT                        | 0014765                      | ap2-like ethylene-<br>responsive transcription<br>factor ant-like | 1.99E-113 | Y   | 0.53            | 0.34            | 1.28          |
| AT5G42630 | KAN4                       | 0013106                      | probable transcription<br>factor kan2-like                        | 6.47E-35  | N   | 3.3             | 3.75            | 1.42          |
| AT5G45980 | WOX8                       | 0045416                      | wuschel-related<br>homeobox 11-like                               | 7.83E-16  | N   | 1.15            | 0.48            | 0.54          |
| AT5G59340 | WOX2                       | 0033393                      | wuschel-related<br>homeobox 4                                     | 1.52E-21  | N   | 0.33            | 0.39            | 1.91          |
| AT3G11260 | WOX5                       | 0019483                      | wuschel-related<br>homeobox 5-like                                | 2.28E-51  | Y   | 1.77            | 3.98            | 3.94          |
| AT5G62000 | ARF2                       | 0001054                      | auxin response factor 2                                           | 0         | N   | 19.42           | 26.39           | 30.43         |
| AT1G01480 | ACS2                       | 0006764                      | 1-aminocyclopropane-<br>1-carboxylate synthase-                   | 0         | Y   | 1.28            | 2.89            | 6.82          |

|           |                |         |                                                                 |               |     |        |        |        |
|-----------|----------------|---------|-----------------------------------------------------------------|---------------|-----|--------|--------|--------|
| AT4G11280 | ACS6           | 0006764 | like<br>1-aminocyclopropane-<br>1-carboxylate synthase-<br>like | 0             | Y   | 1.28   | 2.89   | 6.82   |
| AT4G37770 | ACS8           | 0007505 | 1-aminocyclopropane-<br>1-carboxylate synthase-<br>like         | 0             | Y   | 9.92   | 25.33  | 24.34  |
| AT5G25890 | IAA28          | 0005636 | auxin-responsive<br>protein iaa26-like                          | 5.59E-35      | N   | 13.32  | 20.16  | 43.38  |
| AT2G28350 | ARF10          | 0001279 | auxin response factor<br>18-like                                | 0             | Y   | 5.09   | 5.04   | 4.42   |
| AT5G61850 | LFY            | 0000040 | dna polymerase theta                                            | 4.14          | NSH | 0.001  | 0.001  | 0.001  |
| AT5G60690 | REV            | 0001618 | homeobox-leucine<br>zipper protein revoluta                     | 0             | Y   | 7.93   | 9.77   | 7.39   |
| AT3G44750 | HD2A           | 0027114 | histone deacetylase<br>isoform 2                                | 8.55E-30      | Y   | 286.77 | 270.64 | 131.72 |
| AT2G45450 | ZPR1           | 0041901 | PREDICTED:<br>uncharacterized protein<br>LOC101244019           | 0.03          | N   | 1.46   | 1.48   | 3.71   |
| AT1G55580 | LAS            | 0001820 | scarecrow-like protein<br>28                                    | 2.58E-50      | N   | 10.83  | 13.6   | 4.89   |
| AT1G79580 | SMB            | 0015551 | no apical meristem<br>family protein                            | 1.04E-80      | Y   | 5.84   | 6.09   | 3.13   |
| AT1G26870 | FEZ            | NSH     | NSH                                                             | NSH           | NSH | 0.1    | 0.1    | 0.1    |
| AT1G56010 | NAC1           | 0016854 | nac domain-containing<br>protein 21 22-like                     | 2.92E-70      | Y   | 26.76  | 33.91  | 47.81  |
| AT2G04160 | AIR3           | 0002155 | subtilisin-like protease-<br>like                               | 0             | N   | 6.59   | 10.36  | 37.91  |
| AT3G25710 | TMO5           | 0015249 | transcription factor<br>bhlh30-like                             | 1.25E-64      | N   | 7.38   | 6.47   | 4.98   |
| AT5G42800 | DFR            | 0031589 | dihydroflavonol<br>reductase                                    | 4.90E-<br>104 | Y   | 0.38   | 0.36   | 1.38   |
| AT4G30080 | ARF16          | 0001279 | auxin response factor<br>18-like                                | 0             | Y   | 5.09   | 5.04   | 4.42   |
| AT4G25470 | CBF2           | 0025501 | dehydration-responsive<br>element-binding protein               | 1.90E-45      | N   | 1.11   | 1.73   | 1.02   |
| AT1G04240 | SHY2<br>(IAA3) | 0014302 | auxin-induced protein<br>22b                                    | 1.21E-70      | N   | 35.46  | 36.07  | 16.64  |
| AT4G37650 | SHR            | 0003271 | 5.85E-<br>172                                                   | 172           | Y   | 15.86  | 18.57  | 12.14  |
| AT5G03150 | JKD            | 0003299 | protein short-root<br>zinc finger protein                       | 3.80E-96      | Y   | 15.2   | 16.09  | 12.09  |
| AT3G54220 | SCR            | 0003217 | jackdaw-like isoform x1                                         | 0             | Y   | 16.24  | 26.26  | 18.73  |
| AT1G03840 | MGP            | 0005022 | protein scarecrow-like<br>zinc finger protein                   | 8.02E-<br>127 | Y   | 9.11   | 14.27  | 11.97  |
| AT1G50420 | SCL3           | 0003587 | magpie-like                                                     | 0             | Y   | 12.54  | 13.71  | 17.92  |
| AT5G11260 | HY5            | 0015206 | scarecrow-like protein 3<br>transcription factor hy5-<br>like   | 1.04E-46      | Y   | 49.43  | 33.1   | 27.33  |
| AT4G32880 | ATHB8          | 0000849 | homeobox-leucine<br>zipper family protein                       | 0             | Y   | 12.14  | 14.87  | 11.42  |
| AT4G14550 | IAA14          | 0018103 | auxin-induced protein<br>aux28                                  | 6.06E-99      | Y   | 343.11 | 351.74 | 185.48 |

|           |       |         |                                                                      |           |   |       |       |       |
|-----------|-------|---------|----------------------------------------------------------------------|-----------|---|-------|-------|-------|
| AT5G10510 | AIL6  | 0003496 | ap2-like ethylene-responsive transcription factor ail6-like          | 5.36E-115 | Y | 23.18 | 27.88 | 14.55 |
| AT1G19850 | MP    | 0000685 | transcriptional factor b3 family protein auxin-responsive factor aux | 0         | Y | 5.84  | 8.35  | 33.42 |
| AT3G20840 | PLT1  | 0004605 | iaa-related ovule development family protein                         | 0         | Y | 15.14 | 23.61 | 9.93  |
| AT1G04550 | IAA12 | 0009934 | auxin-responsive protein iaa11-like                                  | 6.86E-58  | N | 22.94 | 32.12 | 39.07 |
| AT1G12980 | ESR1  | 0012720 | ethylene-responsive transcription factor 4-like                      | 1.54E-16  | N | 21.46 | 33.81 | 55.6  |
| AT5G61420 | MYB28 | 0035249 | transcription factor myb35                                           | 3.00E-68  | N | 0.41  | 0.73  | 1.62  |
| AT2G20610 | SUR1  | 0007195 | tyrosine aminotransferase-like                                       | 7.98E-165 | N | 27.15 | 29.93 | 35.17 |
| AT3G12280 | RBR1  | 0001201 | retinoblastoma-related protein                                       | 0         | Y | 18.44 | 21.99 | 19.38 |
| AT2G33880 | WOX9  | 0045416 | wuschel-related homeobox 11-like                                     | 1.43E-22  | N | 1.15  | 0.48  | 0.54  |
| AT1G53230 | TCP3  | 0003653 | transcription factor tcp4-like                                       | 4.30E-70  | N | 2.99  | 3.01  | 3.47  |
| AT1G19220 | ARF19 | 0000777 | auxin response factor 19-like                                        | 0         | Y | 9.5   | 13.97 | 12.13 |
| AT2G42430 | LBD16 | 0023003 | lob domain-containing protein 16                                     | 4.33E-65  | Y | 1.6   | 1.25  | 9.77  |
| AT3G58190 | LBD29 | 0010011 | lob domain-containing protein 29-like                                | 9.93E-63  | N | 3.23  | 4.69  | 9.43  |
| AT2G20180 | PIL5  | 0021486 | transcription factor pif3-like                                       | 1.29E-26  | N | 0.85  | 1.33  | 1.16  |
| AT1G03430 | AHP5  | 0018863 | histidine-containing phosphotransfer                                 | 2.51E-56  | N | 47.56 | 43.54 | 74.89 |
| AT5G54510 | DFL1  | 0006889 | indole-3-acetic acid-amido synthetase                                | 0         | Y | 22.05 | 32.66 | 83.56 |
| AT5G20730 | ARF7  | 0000777 | auxin response factor 19-like                                        | 0         | Y | 12.14 | 14.87 | 11.42 |
| AT3G15540 | IAA19 | 0015499 | auxin-induced protein aux22                                          | 3.88E-50  | Y | 8.92  | 10.69 | 8.52  |
| AT3G50340 |       | 0010064 | PREDICTED: uncharacterized protein LOC100262755                      | 3.12E-165 | Y | 3.36  | 4.24  | 2.85  |
| AT2G45420 | LBD18 | 0044113 | lob domain-containing protein 18-like                                | 3.58E-67  | N | 0.36  | 0.68  | 1.73  |
| AT4G14560 | IAA1  | 0014302 | auxin-induced protein 22b                                            | 6.76E-53  | N | 35.46 | 36.07 | 16.64 |
| AT4G37390 | YDK1  | 0004749 | probable indole-3-acetic acid-amido synthetase                       | 0         | Y | 10.5  | 18.51 | 17.66 |
| AT4G27260 | WES1  | 0006889 | indole-3-acetic acid-amido synthetase                                | 0         | Y | 22.05 | 32.66 | 83.56 |

|           |       |         |                                                            |           |   |        |        |        |
|-----------|-------|---------|------------------------------------------------------------|-----------|---|--------|--------|--------|
| AT5G17430 | BBM   | 0002613 | ap2-like ethylene-responsive transcription factor bbm-like | 1.34E-122 | Y | 9.55   | 13.02  | 6.82   |
| AT5G03740 | HD2C  | 0009674 | histone deacetylase hdt1-like                              | 1.02E-24  | N | 139.84 | 161.42 | 92.97  |
| AT5G22650 | HD2B  | 0027114 | histone deacetylase isoform 3                              | 8.21E-26  | N | 286.77 | 270.64 | 131.72 |
| AT5G18560 | PUCHI | 0012720 | ethylene-responsive transcription factor 4-like            | 3.71E-23  | N | 21.46  | 33.81  | 55.6   |
| AT5G37020 | ARF8  | 0001138 | auxin response factor 8-like                               | 0         | Y | 9.71   | 9.76   | 5.8    |
| AT1G28130 | GH3   | 0004939 | indole-3-acetic acid-amido synthetase -like                | 0         | Y | 7.5    | 7.25   | 14.31  |
| AT5G60890 | MYB34 | 0035249 | transcription factor myb34                                 | 1.30E-67  | N | 0.41   | 0.73   | 1.62   |
| AT4G00220 | LBD30 | 0044113 | lob domain-containing protein 18-like                      | 5.91E-59  | Y | 0.36   | 0.68   | 1.73   |
| AT2G01420 | PIN4  | 0002917 | auxin efflux carrier component 3-like                      | 0         | Y | 1.66   | 2.17   | 5.65   |
| AT1G70940 | PIN3  | 0002917 | auxin efflux carrier component 3-like                      | 0         | Y | 1.66   | 2.17   | 5.65   |
| AT1G23080 | PIN7  | 0002917 | auxin efflux carrier component 3-like                      | 0         | Y | 1.66   | 2.17   | 5.65   |

**Supplementary Table S7.** List of primers used in this work.

| Primer Name | Sequence                 |
|-------------|--------------------------|
| PpUBC9_fw   | GGTGTTCCAGGTATTGAGCTG    |
| PpUBC9_rv   | AGCCATCCTCACAAAAGCAACC   |
| PpYLS8_fw   | ACCGTTCAGGTTGAGGCGAAG    |
| PpYLS8_rv   | GATACCCCAAATAAGCATAGGC   |
| PpEF1a_fw   | GAGGTCTGAAGTTATGGGTCGTG  |
| PpEF1a_rv   | AGCACACCGACGCTACTAATG    |
| * PpTFB4_fw | GCAATGCCTATAGCTCCTCCG    |
| * PpTFB4_rv | GTTGTTGCCCGAGTCACCTTG    |
| * PpHD2C_fw | GGTGAAAGACTCCTGGTGGAG    |
| * PpHD2C_rv | GTGCTTGGCCTTTGTGTGAGAC   |
| * PpXPL1_fw | GGCCAGATGCTTAGAGATGCTG   |
| * PpXPL1_rv | CTCGGATGAACTGATCAGTCC    |
| * PpFBR_fw  | CTGCAGCAAGACCAGTTCAAGC   |
| * PpFBR_rv  | CTGCTTCTTAGGCATGCGGTAAC  |
| * PpGASA_fw | GCTCTCATTGCCATTTCCATGC   |
| * PpGASA_rv | GAAGGCTTGACGCTGCCAGG     |
| * PpHD2A_fw | GGTTTTGGAGTCTAGCGAGGAATG |
| * PpHD2A_rv | TTCCCTGTCTGCCTGTTCTGTTTC |
| PpSUR1_fw   | TGTTAGATGTCACCCGTTGCTG   |
| PpSUR1_rv   | CATGACCATTGTGCCTGATTAGC  |
| PpZIP9_fw   | TCTGAACTGTGGTCTTGGGAATC  |
| PpZIP9_rv   | TCACAATCAACTCAACTAGCACC  |
| PpIAA14_fw  | CTGGGCAAGATGTTTCAGTTCCT  |
| PpIAA14_rv  | AAGATCAGCGGAACAACATCAGC  |
| PpGH3_fw    | TCAACCAAACACCCCAAAGAGC   |
| PpGH3_rv    | TCAACCAAACACCCCAAAGAGC   |

\* primers reported in Shishkova *et al.* (2013), designed for regions with 100% homology between *Stenocereus gummosus* and *Pachycereus pringlei* genes.
